# Supplementary material for: Emotional stability is associated with the MAOA promoter uVNTR polymorphism in women
Source: PubMed Central journal article supplement (PMC6749489; doi:10.1002/brb3.1376), 2019-08-25

Supplementary Figure S1.  
Residual plots of the multiple regression models.

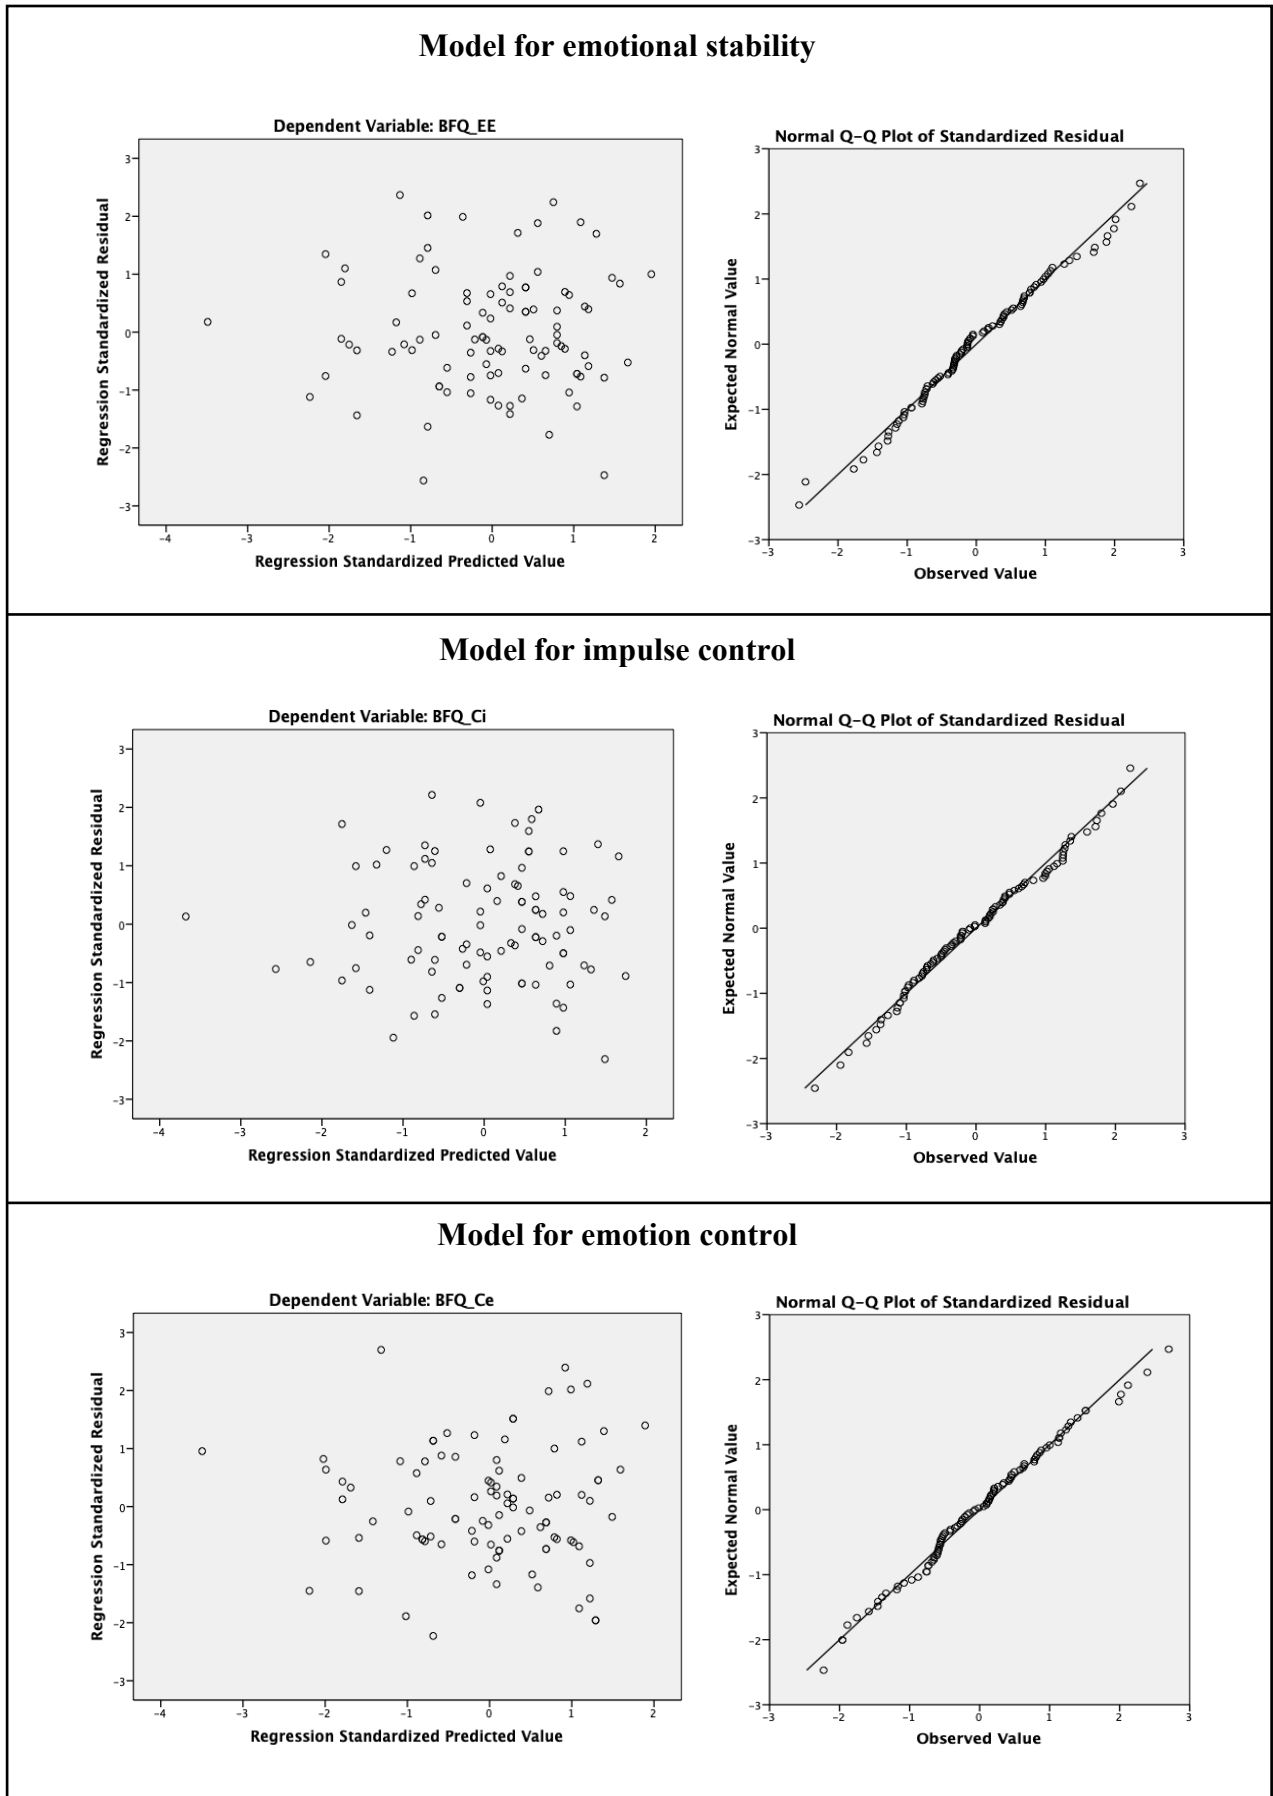

Supplement: BRB3-9-e01376-s001.pdf [file BRB3-9-e01376-s001.pdf]
